# Supplementary material for: Exploring the Colors of Copper-Containing Pigments, Copper (II) Oxide and Malachite, and Their Origins in Ceramic Glazes
Source: MDPI journal article supplement (doi:10.3390/colorants1040023), 2022-09-26
Supplement: s1 [file s1]

# Exploring the colors of copper-containing pigments, copper (II) oxide and malachite, and their origins in ceramic glazes

Iris Peng<sup>a</sup>, Katie Hills-Kimball<sup>a</sup>, Isabela Miñana Lovelace<sup>a</sup>, Junyu Wang<sup>a</sup>, Matthew Rios<sup>b</sup>, Ou Chen<sup>a</sup>, Li-Qiong Wang<sup>a,\*</sup>

**Table S1.** Percentage of different compounds in the base glaze (no colorant) calculated based on values from Digitalfire, an online reference for ceramic artists. Generally, RO = flux, R<sub>2</sub>O<sub>3</sub> = intermediate, RO<sub>2</sub> = glass former.\*

|                                                                   | %weight (wt)          |                         |        |                   |        |
|-------------------------------------------------------------------|-----------------------|-------------------------|--------|-------------------|--------|
|                                                                   | Gerstely borate 59.3% | Nepheline syenite 31.1% | EPK 2% | Flint/silica 7.6% | TOTAL  |
| CaO-flux                                                          | 19.40%                | 0.70%                   | 0.18%  | 3.00%             | 11.95% |
| MgO-flux                                                          | 3.50%                 | 0.10%                   | 0.10%  | 0.10%             | 2.12%  |
| K <sub>2</sub> O-flux                                             | 0.40%                 | 4.60%                   | 0.33%  |                   | 1.67%  |
| Na <sub>2</sub> O-flux                                            | 4.00%                 | 9.80%                   | 0.06%  |                   | 5.42%  |
| P <sub>2</sub> O <sub>5</sub> -glass                              | 0.10%                 |                         | 0.24%  |                   | 0.064% |
| TiO <sub>2</sub> -glass                                           | 0.10%                 |                         | 0.37%  |                   | 0.067% |
| Al <sub>2</sub> O <sub>3</sub> -intermediate                      | 1.00%                 | 23.30%                  | 37.36% |                   | 8.59%  |
| B <sub>2</sub> O <sub>3</sub> -glass                              | 26.80%                |                         |        |                   | 15.89% |
| SiO <sub>2</sub> -glass                                           | 14.80%                | 60.70%                  | 45.73% | 94.00%            | 35.71% |
| Fe <sub>2</sub> O <sub>3</sub> -refractory antflux (intermediate) | 0.40%                 | 0.10%                   | 0.79%  | 0.10%             | 0.29%  |
| Loss on ignition + weight loss during drying (approx.)            | 29.5%                 | 0.70%                   | 14.81% | 3.00%             | 18.24% |

\*Hansen, T. Glaze Chemistry Basics - Formula, Analysis, Mole%, Unity, LOI [Internet]. <https://digitalfire.com/>; 2015, [cited 8 November 2019]. Available from:

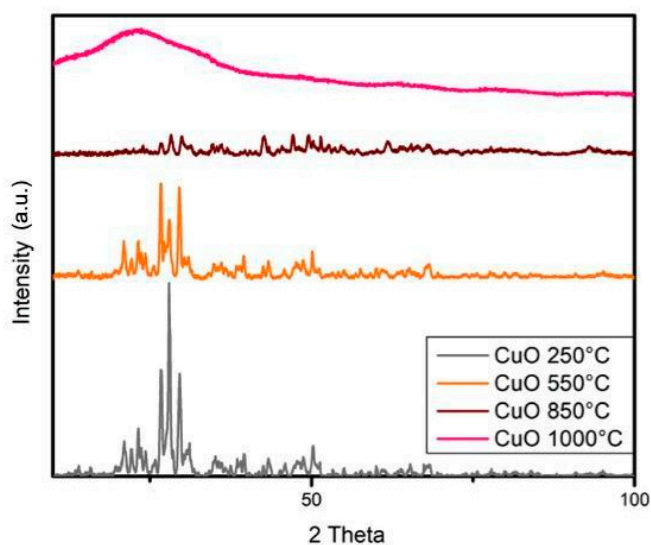

**Figure S1.** XRD spectra for the 1% CuO glaze series.

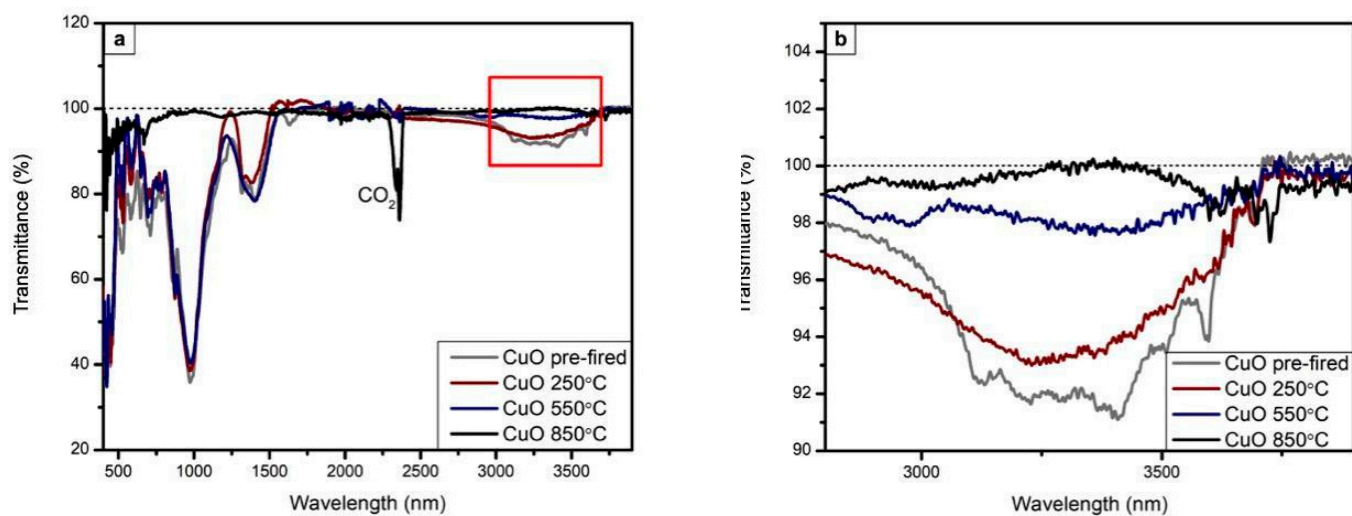

**Figure S2.** a) FTIR spectra of 1% CuO glazes before firing, after 250°C, after 550°C, and after 850°C. b) Zoomed-in area of the red box on Fig. S2a, illustrating the broad, water stretch peaks around 3300  $\text{cm}^{-1}$ . The signal gradually approaches 100% transmission with increasing firing temperatures, indicating that both free and crystal-bound water is lost throughout the firing process.
