# Supplementary material for: Exploring the Colors of Copper-Containing Pigments, Copper (II) Oxide and Malachite, and Their Origins in Ceramic Glazes
Source: MDPI journal article supplement (doi:10.3390/colorants1040023), 2022-09-26
Supplement: s1 [file s1]

Archive with 1 entries (1 files):
- colorants-1769447-supplementary.pdf
